1 **SOAPTyping: an open-source and cross-platform tool for Sanger**  
2 **sequence-based typing for HLA class I and II alleles**

3 *Yong Zhang<sup>1†</sup>, Yongsheng Chen<sup>2†</sup>, Huixin Xu<sup>1†</sup>, Junbin Fang<sup>3†</sup>, Zijian Zhao<sup>1</sup>, Weipeng Hu<sup>1,4</sup>,*  
4 *Xiaoqin Yang<sup>3</sup>, Jia Ye<sup>1</sup>, Yun Cheng<sup>6</sup>, Jiayin Wang<sup>7</sup>, Jian Wang<sup>1,5</sup>, Huanming Yang<sup>1,5</sup>, Jing*  
5 *Yan<sup>6\*\*</sup> and Lin Fang<sup>1\*</sup>*

6 *1 BGI-Shenzhen, Shenzhen 518083, China;*

7 *2 Geneplus-Beijing, Beijing 102206, China;*

8 *3 BGI Genomics, BGI-Shenzhen 518083, China;*

9 *4 China National GeneBank, BGI-Shenzhen, Shenzhen 518120, China;*

10 *5 James D. Watson Institute of Genome Science, 310008 Hangzhou, China;*

11 *6 Zhejiang Hospital, No 12 Lingyin Road ,Xihu District ,Hangzhou 310013 China;*

12 *7 Department of Computer Science and Technology, Xi'an Jiaotong University, 28 West Xianning Road,*  
13 *Xi'an, Shaanxi 710048, China;*

14

15 *†Contributed equally*

16 *\*First corresponding author*

17 *\*\*Second corresponding author*

18

19

20

21

22

23

24

25

26

27

28 **ABSTRACT**

29 **Summary:** The human leukocyte antigen (HLA) gene family plays a key role in the immune  
30 response and thus is crucial in many biomedical and clinical settings. Utilizing Sanger  
31 sequencing - the gold standard technology for HLA typing – enables accurate identification of  
32 HLA alleles with high-resolution. However, there exists a current hurdle that only commercial  
33 software such as UType, SBT-Assign and SBTEngine, instead of any open source tools could be  
34 applied to perform HLA typing based on Sanger sequencing. To fill the gap, we developed a  
35 stand-alone, open-source and cross-platform software, known as SOAPTyping, for Sanger-based  
36 typing in HLA class I and II alleles.

37 **Availability and implementation:** SOAPTyping is implemented in C++ language and Qt  
38 framework, which is supported on Windows, Mac and Linux. Source code and detailed  
39 documentation are accessible via the project GitHub page:  
40 <https://github.com/BGI-flexlab/SOAPTyping>.

41 **Contact:** [fangl@genomics.cn](mailto:fangl@genomics.cn)

42 **Supplementary information:** Supplementary data are available at Bioinformatics online.

43

44

45

46

47

48

49

50

51

52

53

54

55

56

57

## 58 INTRODUCTION

59 Human leukocyte antigens (HLA), encoded on 6p21.3, make up the human major  
60 histocompatibility complex (MHC) regions with high polymorphism and are featured in  
61 the immunity system (Dendrou et al., 2018). Accurate HLA allele determination ('HLA  
62 Typing') is potent and crucial in various biomedical and clinical processes, especially in  
63 the field of solid organ and bone marrow transplantation (Mahdi, 2013). Sequence  
64 Based Typing (SBT), including Sanger sequence-based typing (SSBT) and  
65 next-generation sequence (NGS) typing, is widely used for high-resolution four-digit  
66 allele level identification of HLA class I and II alleles (Erlich, 2012). Advantaging in  
67 producing the sequenced DNA in contiguous form, SSBT serves as the gold standard for  
68 HLA typing, which applies polymerase chain reaction (PCR) to amplify loci of targets  
69 while utilizing Sanger sequencing and related software to determine the nucleotide  
70 sequence of the PCR product. Sanger sequencing sometimes rises phase ambiguities due  
71 to multiple polymorphisms shared between alleles, which requires further steps using  
72 group specific sequencing primers (GSSP).

73 While SSBT is reliable and routine for clinical use, there are no open-source tools  
74 currently available but only commercial and Windows-supported software, such as  
75 UType (Life Technologies. Brown Deer, WI), SBT-Assign (Conexio, San Francisco, CA)  
76 and SBTEngine (GenDx, Utrecht, Netherlands), to perform sequence analysis and allele  
77 assignments for SSBT, and thus limits its application. Hence, SOAPTyping was  
78 developed as a fast, accurate and effective cross-platform software with user-friendly  
79 interface for SSBT in HLA class I and II alleles. Supported on Windows, Mac and Linux,  
80 SOAPTyping also provides a neat and interactive user interface and generates  
81 specialized report format. No proficient computer skills are required for users to  
82 effectively complete the analysis with a comprehensible protocol and produce accurate  
83 results. SOAPTyping also integrates group specific sequencing primers (GSSP)  
84 prediction system to resolve the alleles ambiguity. SOAPTyping is open source and  
85 freely available at <https://github.com/BGI-flexlab/SOAPTyping>.

## 86 IMPLEMENTATIONS

87 SOAPTyping is a flexible and powerful application implemented in C++ with its  
88 user-friendly interface developed in Qt framework, which is supported on Windows,  
89 Mac and Linux. SOAPTyping is capable of analyzing loci located in HLA class I (A, B, C  
90 and G) and II (DR-, DQ- and DP-) genes (Table S1). It mainly comprises modules  
91 specialized for database, backend analysis and visualization.

92 Database: SOAPTyping offers database update functions to cater to the frequently  
93 updated HLA alleles. Nucleotide sequence alignments files of the IMGT/HLA database  
94 (Robinson et al., 2015) were applied to perform sequence format conversion with the  
95 scripts provided on our website, such files ending up with storage in the static database  
96 to serve as the reference of alignments. GSSP prediction system is available to resolve  
97 the ambiguity caused by phase problems, that GSSP binds to only one of the two alleles  
98 present in the DNA sample aiding the determination of the final HLA typing. Involved  
99 database could be manually prepared for updates by following instructions in the  
100 supplementary materials (supplementary Section 2.9).

101 Backend analysis: Sequences derived from the input ABIF files were called  
102 homozygotes or heterozygotes. After being presented as lists of degenerate bases,  
103 sequences are aligned to the consensus sequences and alleles in the IMGT/HLA  
104 database to assign the eligible allele pairs with utilization of a modified semi-global  
105 alignment method (supplementary Section 1.3). SOAPTyping produces a standardized  
106 output following nomenclature of HLA alleles (Marsh et al., 2010).

107 Visualization: As shown in Figure 1, the results are presented in a main window of  
108 SOAPTyping consists of panes of Toolbar, Base Navigator, Sequence Display, Sample  
109 List, Allele Match List and Electropherogram Display.

110 Best practices / proposed workflow: SOAPTyping works on chromatogram files with  
111 the format of ABIF, including .ab1 and .fsa files, which are generated from Sanger  
112 sequencing by ABI Genetic Analyzer Software (Applied Biosystems, Foster City, CA).  
113 Top candidate allele pair matches are presented in the Allele Match List. If necessary,  
114 users could manually review and edit marked positions which result from discrepant  
115 sites between forward and reverse sequences or mismatches with consensus sequence(s)  
116 till completion of at least one trace with 'o' mismatch in the Allele Match List. Best  
117 practices and proposed workflow are provided in Figure S3 and supplementary Section  
118 2 to facilitate and guide efficient use of SOAPTyping.

## 119 **RESULTS**

120 To verify the accuracy of SOAPTyping, our test data contains 36 samples initiated  
121 for external quality assessments with the University of California Los Angeles (UCLA)  
122 International HLA DNA Exchange (Los Angeles, CA, USA). Genomic DNAs with known  
123 HLA typing results were obtained from UCLA and amplified using locus-specific  
124 primers. The PCR products were directly sequenced in HLA-A, -B, -C, -DRB1 and -DQB1  
125 (Table S1) using a 3730XL DNA Analyzer (Applied Biosystems, Foster City, CA).  
126 Sequencing reaction was performed using the BigDye® Terminator v3.1 Cycle  
127 Sequencing Ready Reaction Kit (Applied Biosystems). The sequence was analyzed with  
128 SOAPTyping and the typing results were compared to the consensus based on high  
129 resolution provided by UCLA. The consistency of SOAPTyping in typing HLA alleles at  
130 four-digit was verified to be accurate at the level of 100% (36/36) for HLA-A, 100%  
131 (36/36) for HLA-B, 100% (36/36) for HLA-C, and 100% (36/36) for HLA- DRB1, 100%  
132 (36/36) for HLA- DQB1. The detailed results of 36 tested samples were shown in Table  
133 S13. The test data have been deposited in the CNSA (<https://db.cngb.org/cnsa/>) of  
134 CNGBdb with an accession code CNP0000512.

## 135 **DISCUSSIONS**

136 SOAPTyping was introduced in this article as the first open-source and  
137 cross-platform HLA typing software with the capability of producing high-resolution  
138 HLA typing predictions from Sanger sequence data. While high consistency with other  
139 commercial typing software is achieved comparing to actual HLA typing results, we  
140 demonstrated that SOAPTyping could be efficiently and effectively applied to practical  
141 use while some augmentation will still be anticipated in the future. With the challenge of  
142 upscaling of the HLA alleles in the IMGT/HLA database, future improvements of the  
143 efficiency of searching for the candidate allele pairs are needed to enhance its  
144 performance. Optimum search strategies will be required to develop while maintaining  
145 accuracy of typing results with at least four-digit resolution.

## 146 **Acknowledgements**

147 We would also like to thank Taipu Lin, Jason Chen and Yuchong Tan for useful  
148 suggestions on the writing of the paper.

149 **Funding**

150 This work was supported in part by grants of the Collaborative Innovation Center of  
151 High Performance Computing; National Natural Science Foundation of China [No.  
152 61433009, No. 81772051]; and Guangdong Natural Science Foundation  
153 [2015A030308017].

154 **Competing interests**

155 The authors declare that they have no competing interests.

156 **REFERENCE**

- 157 Dendrou C, et al. (2018) HLA variation and disease. *Nature Reviews Immunology*, 18(5),  
158 325–339.
- 159 Erlich H. (2012) HLA DNA typing: past, present, and future. *Tissue Antigens*, 80, 1-11.
- 160 Mahdi BM. (2013) A glow of HLA typing in organ transplantation. *Clinical and Translational*  
161 *Medicine*, 2, 6.
- 162 Marsh SGE, et al. (2010) Nomenclature for factors of the HLA system. *Tissue Antigens*, 75(4),  
163 291-455.
- 164 Robinson J, et al. (2015) The IPD and IMGT/HLA database: allele variant databases. *Nucleic*  
165 *Acids Research*, 43(Database issue), D423-D431.

166

167 **FIGURES**

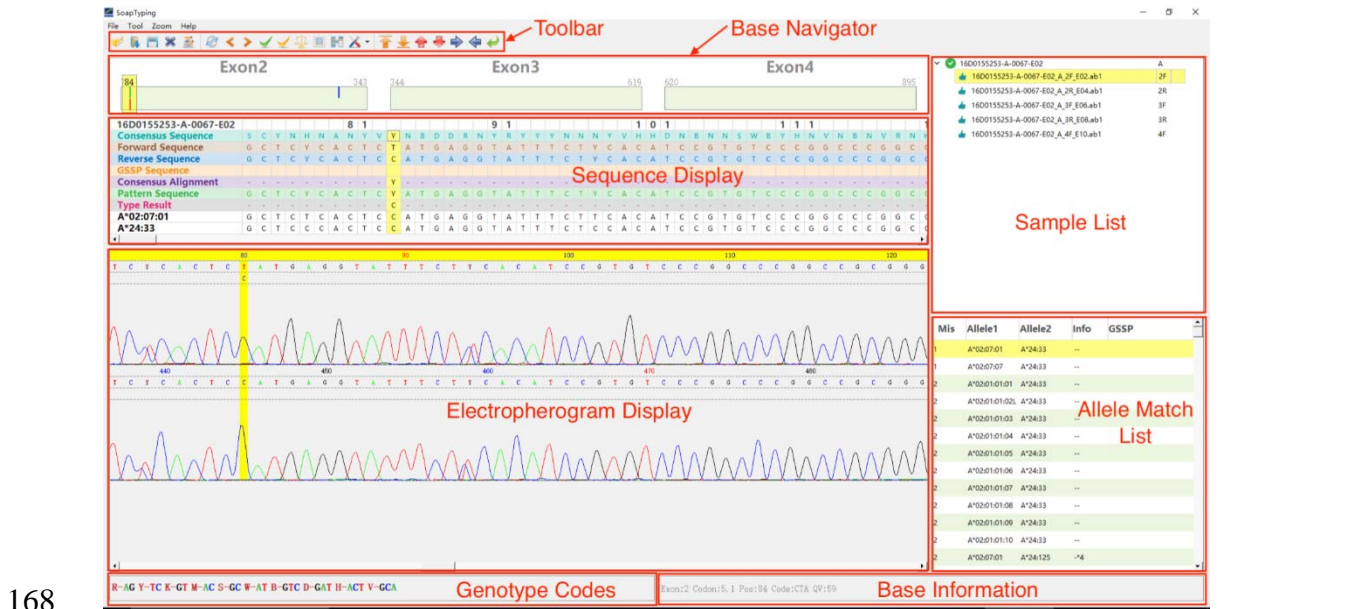

Source: https://www.biorxiv.org/content/biorxiv/early/2019/06/20/674648.full.pdf
